# Supplementary material for: Immunization with full-length Plasmodium falciparum merozoite surface protein 1 is safe and elicits functional cytophilic antibodies in a randomized first-in-human trial
Source: PubMed Central journal article supplement (PMC6994672; doi:10.1038/s41541-020-0160-2), 2020-01-31
Supplement: 41541_2020_160_MOESM1_ESM.pdf [file 41541_2020_160_MOESM1_ESM.pdf]

**Supplementary Table 1:** Distribution of solicited and unsolicited adverse events by MedDRA High Level Group Term by treatment group and cycle (regular: 1-3, boost: 4). The figures in cells represent number of events followed by the number of participants in brackets.

|                                                            | Vaccination 1 to 3 (blinded) |               |              |              |              | Vaccination 4 (optional - open) |              |              |
|------------------------------------------------------------|------------------------------|---------------|--------------|--------------|--------------|---------------------------------|--------------|--------------|
|                                                            | SumayaVac-1                  |               |              | GLA-SE       | 0.9 % NaCl   | SumayaVac-1                     |              |              |
|                                                            | 25 µg                        | 50 µg         | 150 µg       | 5 µg         | 1 ml         | 25 µg                           | 50 µg        | 150 µg       |
|                                                            | <i>N</i> = 6                 | <i>N</i> = 12 | <i>N</i> = 6 | <i>N</i> = 4 | <i>N</i> = 4 | <i>N</i> = 5                    | <i>N</i> = 9 | <i>N</i> = 4 |
| Administration site reactions                              | 28 (6)                       | 101 (12)      | 29 (6)       | 16 (4)       | 14 (4)       | 8 (5)                           | 17 (7)       | 8 (3)        |
| Headaches                                                  | 12 (5)                       | 13 (7)        | 8 (4)        | 5 (3)        | 10 (2)       | 2 (1)                           | 5 (3)        |              |
| General system disorders NEC                               | 4 (2)                        | 13 (8)        | 9 (4)        | 3 (1)        | 4 (3)        |                                 | 4 (2)        |              |
| Infections - pathogen unspecified                          | 11 (6)                       | 10 (7)        | 3 (3)        | 1 (1)        | 2 (2)        | 1 (1)                           | 4 (3)        | 2 (2)        |
| Epidermal and dermal conditions                            | 1 (1)                        | 14 (7)        | 2 (2)        | 3 (2)        | 2 (2)        | 1 (1)                           |              | 1 (1)        |
| Protein and chemistry analyses NEC                         | 1 (1)                        | 5 (3)         | 5 (3)        | 3 (2)        |              | 2 (2)                           | 3 (2)        | 1 (1)        |
| Gastrointestinal signs and symptoms                        | 3 (3)                        | 6 (4)         | 2 (1)        | 5 (1)        |              |                                 | 2 (2)        |              |
| Vascular haemorrhagic disorders                            | 1 (1)                        | 6 (4)         | 1 (1)        | 6 (3)        |              |                                 |              |              |
| Hepatobiliary investigations                               | 2 (1)                        | 5 (4)         |              | 2 (2)        | 1 (1)        |                                 |              | 1 (1)        |
| Skin appendage conditions                                  | 3 (2)                        | 3 (3)         | 2 (2)        | 1 (1)        | 1 (1)        |                                 |              |              |
| Haematology investigations (incl blood groups)             | 1 (1)                        | 3 (3)         | 5 (2)        |              |              |                                 |              |              |
| Injuries NEC                                               |                              | 3 (3)         | 3 (2)        | 1 (1)        |              |                                 |              | 2 (2)        |
| Gastrointestinal motility and defaecation conditions       |                              | 6 (4)         | 1 (1)        |              | 1 (1)        |                                 |              |              |
| Neurological disorders NEC                                 | 1 (1)                        | 2 (1)         | 1 (1)        | 1 (1)        | 3 (1)        |                                 |              |              |
| Spleen, lymphatic and reticuloendothelial system disorders | 1 (1)                        | 5 (3)         | 1 (1)        |              |              |                                 |              | 1 (1)        |
| Respiratory tract signs and symptoms                       | 1 (1)                        | 3 (2)         |              | 1 (1)        |              | 2 (1)                           |              |              |
| Joint disorders                                            | 1 (1)                        |               |              |              | 1 (1)        | 2 (1)                           | 2 (2)        |              |
| Muscle disorders                                           | 2 (2)                        | 1 (1)         | 2 (2)        |              |              | 1 (1)                           |              |              |
| Musculoskeletal and connective tissue disorders NEC        | 2 (1)                        | 2 (1)         |              |              | 1 (1)        |                                 | 1 (1)        |              |
| Body temperature conditions                                | 2 (2)                        | 2 (2)         |              | 1 (1)        |              |                                 |              |              |









Table with 20 columns and 550 rows. Each row contains a long alphanumeric code followed by numerical values, some of which are enclosed in red boxes. The codes include various alphanumeric sequences such as '527 KDVDFARSARYTN', '528 DVDFARSARYTN', etc., up to '659 KNAQLQSHVYNY'. The numerical values range from 0 to over 4000, with some values in red boxes indicating specific data points.

Table with 10 columns and 550 rows, providing additional numerical data for each row. Values range from 0 to 1500. The 10th row contains a red box around the value 7.









Table with 45 columns and 1000 rows, containing numerical data and alphanumeric identifiers.

Table with 32 columns and 1000+ rows. Each row contains a 32-bit binary string and a corresponding numerical value. The binary strings are 32 bits long, with some rows having leading zeros. The numerical values are integers ranging from 0 to 1706. The table is organized into 1000 rows, each representing a different configuration or state.



Table with 33 columns and 500 rows. Each row contains a code (e.g., 1458 DLESHVKEEKEE) followed by 32 numerical values. The values are mostly integers, with some decimal points. The codes are alphanumeric strings of varying lengths. The numerical values range from 0 to over 5000. The table is organized into a grid-like structure with the codes in the first column and the numerical values in the subsequent columns.



















|     |                 |         |    |        |              |    |                                            |    |                      |          |                  |                     |            |                              |                              |                                                      |    |     |     |
|-----|-----------------|---------|----|--------|--------------|----|--------------------------------------------|----|----------------------|----------|------------------|---------------------|------------|------------------------------|------------------------------|------------------------------------------------------|----|-----|-----|
| 528 | Caucasian/White | 31 1995 | 22 | Female | 25 ug MSP-1  | 7  | 7 common cold                              | No | Not related          | Mild     | Dose not changed | Recovered/ resolved | 27/11/2017 | Common cold                  | Nasopharyngitis              | Infections and infestations                          | 18 | 48  | 55  |
| 529 | Caucasian/White | 31 1995 | 22 | Female | 25 ug MSP-1  | 10 | 10 pain at injection site                  | No | (Definitely) related | Mild     | Not applicable   | Recovered/ resolved | 01/12/2017 | Injection site pain          | Injection site pain          | General disorders and administration site conditions | 0  | 57  | 59  |
| 530 | Caucasian/White | 31 1995 | 22 | Female | 25 ug MSP-1  | 8  | 8 warmth at injection site                 | No | (Definitely) related | Mild     | Dose not changed | Recovered/ resolved | 06/12/2017 | Injection site warmth        | Injection site warmth        | General disorders and administration site conditions | 1  | 58  | 64  |
| 531 | Caucasian/White | 31 1995 | 22 | Female | 25 ug MSP-1  | 9  | 9 induration at injection site             | No | (Definitely) related | Mild     | Dose not changed | Recovered/ resolved | 01/12/2017 | Injection site induration    | Injection site induration    | General disorders and administration site conditions | 1  | 58  | 59  |
| 532 | Caucasian/White | 31 1995 | 22 | Female | 25 ug MSP-1  | 11 | 11 Myalgia at upper arm, left              | No | (Definitely) related | Mild     | Dose not changed | Recovered/ resolved | 01/12/2017 | Myalgia upper extremities    | Myalgia                      | Musculoskeletal and connective tissue disorders      | 1  | 58  | 59  |
| 533 | Caucasian/White | 31 1995 | 22 | Female | 25 ug MSP-1  | 12 | 12 Headache                                | No | Unlikely             | Mild     | Not applicable   | Recovered/ resolved | 13/12/2017 | Headache                     | Headache                     | Nervous system disorders                             | 14 | 71  | 71  |
| 534 | Caucasian/White | 31 1995 | 22 | Female | 25 ug MSP-1  | 13 | 13 Headache                                | No | Unlikely             | Moderate | Not applicable   | Recovered/ resolved | 20/12/2017 | Headache                     | Headache                     | Nervous system disorders                             | 20 | 77  | 78  |
| 535 | Caucasian/White | 31 1995 | 22 | Female | 25 ug MSP-1  | 14 | 14 Pain at injection site                  | No | (Definitely) related | Moderate | Not applicable   | Recovered/ resolved | 23/03/2018 | Injection site pain          | Injection site pain          | General disorders and administration site conditions | 1  | 170 | 171 |
| 536 | Caucasian/White | 31 1995 | 22 | Female | 25 ug MSP-1  | 15 | 15 CRP increased                           | No | (Definitely) related | Moderate | Not applicable   | Recovered/ resolved | 28/03/2018 | C-reactive protein increased | C-reactive protein increased | Investigations                                       | 2  | 171 | 176 |
| 537 | Caucasian/White | 31 1995 | 22 | Female | 25 ug MSP-1  | 16 | 16 Lymphopenia                             | No | Possible             | Mild     | Not applicable   | Recovered/ resolved | 28/03/2018 | Lymphopenia                  | Lymphopenia                  | Blood and lymphatic system disorders                 | 2  | 171 | 176 |
| 538 | Caucasian/White | 31 1995 | 22 | Female | 25 ug MSP-1  | 17 | 17 Ear pain, left                          | No | Unlikely             | Mild     | Not applicable   | Recovered/ resolved | 27/03/2018 | Ear pain                     | Ear pain                     | Ear and labyrinth disorders                          | 5  | 174 | 175 |
| 539 | Caucasian/White | 31 1995 | 22 | Female | 25 ug MSP-1  | 18 | 18 Headache                                | No | Possible             | Mild     | Not applicable   | Recovered/ resolved | 27/03/2018 | Headache                     | Headache                     | Nervous system disorders                             | 5  | 174 | 175 |
| 540 | Caucasian/White | 31 1995 | 22 | Female | 25 ug MSP-1  | 19 | 19 Gastroenteritis                         | No | Unlikely             | Mild     | Not applicable   | Recovered/ resolved | 07/04/2018 | Gastroenteritis              | Gastroenteritis              | Infections and infestations                          | 13 | 182 | 186 |
| 541 | Caucasian/White | 31 1995 | 22 | Female | 25 ug MSP-1  | 20 | 20 Lymphopenia                             | No | Possible             | Mild     | Not applicable   | Recovered/ resolved | 18/04/2018 | Lymphopenia                  | Lymphopenia                  | Blood and lymphatic system disorders                 | 14 | 183 | 197 |
| 542 | Caucasian/White | 31 1995 | 22 | Female | 25 ug MSP-1  | 21 | 21 Headache                                | No | Possible             | Mild     | Not applicable   | Recovered/ resolved | 17/04/2018 | Headache                     | Headache                     | Nervous system disorders                             | 27 | 196 | 196 |
| 543 | Caucasian/White | 32 1996 | 21 | Female | 150 ug MSP-1 | 1  | 1 pain at injection site                   | No | (Definitely) related | Mild     | Dose not changed | Recovered/ resolved | 07/10/2017 | Injection site pain          | Injection site pain          | General disorders and administration site conditions | 0  | 1   | 4   |
| 544 | Caucasian/White | 32 1996 | 21 | Female | 150 ug MSP-1 | 3  | 3 fatigue                                  | No | Probable             | Mild     | Dose not changed | Recovered/ resolved | 05/10/2017 | Fatigue                      | Fatigue                      | General disorders and administration site conditions | 0  | 1   | 2   |
| 545 | Caucasian/White | 32 1996 | 21 | Female | 150 ug MSP-1 | 5  | 5 cephalgie                                | No | Probable             | Mild     | Dose not changed | Recovered/ resolved | 05/10/2017 | Cephalgia                    | Headache                     | Nervous system disorders                             | 0  | 1   | 2   |
| 546 | Caucasian/White | 32 1996 | 21 | Female | 150 ug MSP-1 | 6  | 6 sweating                                 | No | Probable             | Mild     | Dose not changed | Recovered/ resolved | 05/10/2017 | Sweating                     | Hyperhidrosis                | Skin and subcutaneous tissue disorders               | 0  | 1   | 2   |
| 547 | Caucasian/White | 32 1996 | 21 | Female | 150 ug MSP-1 | 2  | 2 warmth at injection site                 | No | Probable             | Mild     | Dose not changed | Recovered/ resolved | 07/10/2017 | Injection site warmth        | Injection site warmth        | General disorders and administration site conditions | 2  | 3   | 4   |
| 548 | Caucasian/White | 32 1996 | 21 | Female | 150 ug MSP-1 | 4  | 4 hematoma at injection site               | No | Probable             | Mild     | Dose not changed | Recovered/ resolved | 13/10/2017 | Hematoma injection site      | Injection site haematoma     | General disorders and administration site conditions | 5  | 6   | 10  |
| 549 | Caucasian/White | 32 1996 | 21 | Female | 150 ug MSP-1 | 7  | 7 pain at injection site                   | No | (Definitely) related | Mild     | Dose not changed | Recovered/ resolved | 08/11/2017 | Injection site pain          | Injection site pain          | General disorders and administration site conditions | 1  | 31  | 36  |
| 550 | Caucasian/White | 32 1996 | 21 | Female | 150 ug MSP-1 | 8  | 8 swelling at injection site               | No | (Definitely) related | Mild     | Dose not changed | Recovered/ resolved | 04/11/2017 | Injection site swelling      | Injection site swelling      | General disorders and administration site conditions | 1  | 31  | 32  |
| 551 | Caucasian/White | 32 1996 | 21 | Female | 150 ug MSP-1 | 9  | 9 pruritus at injection site               | No | (Definitely) related | Mild     | Dose not changed | Recovered/ resolved | 04/11/2017 | Injection site pruritus      | Injection site pruritus      | General disorders and administration site conditions | 1  | 31  | 32  |
| 552 | Caucasian/White | 32 1996 | 21 | Female | 150 ug MSP-1 | 10 | 10 warmth at injection site                | No | (Definitely) related | Mild     | Dose not changed | Recovered/ resolved | 08/11/2017 | Injection site warmth        | Injection site warmth        | General disorders and administration site conditions | 1  | 31  | 36  |
| 553 | Caucasian/White | 32 1996 | 21 | Female | 150 ug MSP-1 | 11 | 11 Erythema at injection site              | No | (Definitely) related | Mild     | Dose not changed | Recovered/ resolved | 08/11/2017 | Injection site erythema      | Injection site erythema      | General disorders and administration site conditions | 2  | 32  | 36  |
| 554 | Caucasian/White | 32 1996 | 21 | Female | 150 ug MSP-1 | 12 | 12 Rash (sural, both sides)                | No | Possible             | Mild     | Dose not changed | Recovered/ resolved | 06/11/2017 | Rash both legs               | Rash                         | Skin and subcutaneous tissue disorders               | 2  | 32  | 34  |
| 555 | Caucasian/White | 32 1996 | 21 | Female | 150 ug MSP-1 | 13 | 13 warmth at injection site                | No | (Definitely) related | Mild     | Dose not changed | Recovered/ resolved | 29/11/2017 | Injection site warmth        | Injection site warmth        | General disorders and administration site conditions | 0  | 57  | 57  |
| 556 | Caucasian/White | 32 1996 | 21 | Female | 150 ug MSP-1 | 14 | 14 Abdominal pain                          | No | Unlikely             | Mild     | Dose not changed | Recovered/ resolved | 07/12/2017 | Abdominal pain               | Abdominal pain               | Gastrointestinal disorders                           | 7  | 64  | 65  |
| 557 | Caucasian/White | 32 1996 | 21 | Female | 150 ug MSP-1 | 15 | 15 Nausea                                  | No | Unlikely             | Mild     | Dose not changed | Recovered/ resolved | 07/12/2017 | Nausea                       | Nausea                       | Gastrointestinal disorders                           | 7  | 64  | 65  |
| 558 | Caucasian/White | 32 1996 | 21 | Female | 150 ug MSP-1 | 16 | 16 Diarrhea                                | No | Unlikely             | Mild     | Dose not changed | Recovered/ resolved | 07/12/2017 | Diarrhea                     | Diarrhoea                    | Gastrointestinal disorders                           | 7  | 64  | 65  |
| 559 | Caucasian/White | 32 1996 | 21 | Female | 150 ug MSP-1 | 17 | 17 Hematoma at place of i.v. catheter left | No | Not related          | Mild     | Not applicable   | Recovered/ resolved | 18/04/2018 | Catheter site haematoma      | Catheter site haematoma      | General disorders and administration site conditions | 1  | 191 | 197 |
| 560 | Caucasian/White | 32 1996 | 21 | Female | 150 ug MSP-1 | 19 | 19 CRP increased                           | No | Possible             | Mild     | Not applicable   | Recovered/ resolved | 25/04/2018 | CRP increased                | C-reactive protein increased | Investigations                                       | 2  | 192 | 204 |
| 561 | Caucasian/White | 32 1996 | 21 | Female | 150 ug MSP-1 | 18 | 18 Inversion ankle sprain left             | No | Not related          | Mild     | Not applicable   | Recovered/ resolved | 30/11/2018 | Ankle sprain                 | Ligament sprain              | Injury, poisoning and procedural complications       | 4  | 194 | 423 |
| 562 | Caucasian/White | 32 1996 | 21 | Female | 150 ug MSP-1 | 20 | 20 Common cold symptoms                    | No | Possible             | Mild     | Not applicable   | Recovered/ resolved | 13/05/2018 | Common cold                  | Nasopharyngitis              | Infections and infestations                          | 25 | 215 | 222 |

## Variables in Creation Order

| #  | Variable       | Type | Label                                        |
|----|----------------|------|----------------------------------------------|
| 1  | ethnic         | Char |                                              |
| 2  | STUDYID        | Char | Study ID                                     |
| 3  | SITEID         | Char | Currently treating site                      |
| 4  | USUBJID        | Num  | Participant ID                               |
| 5  | BIRTHDTC       | Char | Year of birth                                |
| 6  | AGE            | Num  | Age at day of inclusion                      |
| 7  | SEX            | Num  | Gender                                       |
| 8  | armcd          | Num  | Treatment group                              |
| 16 | AESEQ          | Num  | AE No. (unified per patient)                 |
| 17 | AESPID         | Num  | AE CRF No                                    |
| 18 | AETERM         | Char | Description of AE (only one finding per row) |
| 19 | AESER          | Num  | Serious?                                     |
| 20 | AEREL          | Num  | Relatedness                                  |
| 22 | AESEV          | Num  | CTCAE-grade                                  |
| 23 | AEINTER        | Num  | Intermittent                                 |
| 24 | AEACN          | Num  | Action taken                                 |
| 25 | AEOUT          | Num  | Outcome                                      |
| 30 | Split_No_      | Num  | Split No#                                    |
| 31 | LLT            | Num  | LLT                                          |
| 32 | PT             | Num  | PT                                           |
| 33 | SOC            | Num  | SOC                                          |
| 34 | LLT_Coded_Term | Char | LLT_Coded_Term                               |
| 35 | PT_Coded_Term  | Char | PT_Coded_Term                                |
| 36 | SOC_Coded_Term | Char | SOC_Coded_Term                               |
| 49 | aedosdur       | Num  |                                              |
| 50 | aestdy         | Num  | Study Day of start of AE                     |
| 51 | aeendy         | Num  | Study Day of end of AE                       |

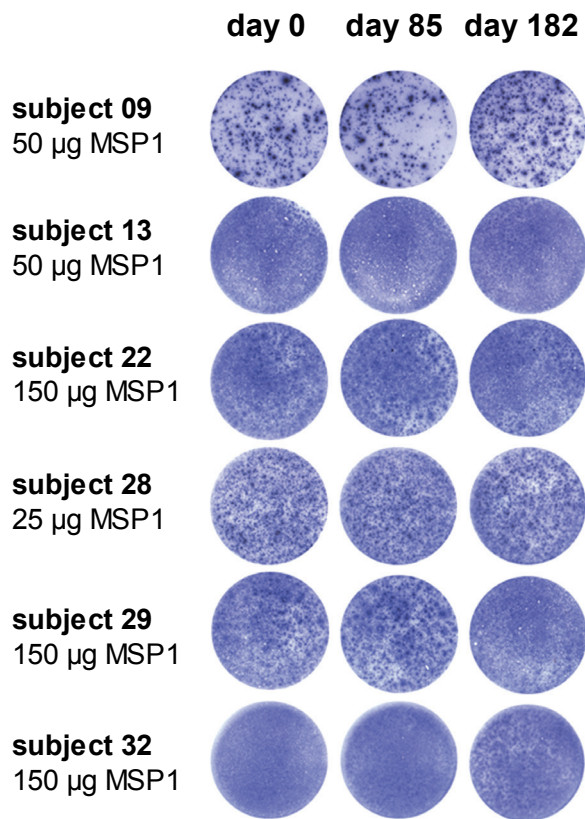

**Supplementary Fig. 1** PBMCs from six volunteers immunized three times with SumayaVac-1 were stimulated with a monoclonal antibody against CD3 in the cultured ELISpot assay.
